# Supplementary material for: Embryo selection tools in IVF can favour XY embryos: implications for equitable reproductive AI
Source: Research Square preprint supplement (doi:10.21203/rs.3.rs-8230063/v1), 2025-12-22
Supplement: Supplementary file 1 [file cc563a08f4ba26ca387886c7.docx]

# **Supplementary Materials**

**Supplementary Table 1 | Post-hoc comparison of morphokinetic parameters between XX and XY embryos.**

Mean and standard deviations are provided. P-values were computed using two-sided Mann-Whitney U tests. Note that the slight variations in *n* for each comparison are due to missing annotations.

| **Marker** | **XX (M ± SD)** | **XY (M ± SD)** | **XX (n)** | **XY (n)** | **P-value** |
| --- | --- | --- | --- | --- | --- |
| tPNf | 18.248 ± 8.160 | 17.632 ± 7.984 | 628 | 679 | 0.134 |
| t2 | 21.151 ± 8.030 | 20.66 ± 7.720 | 628 | 678 | 0.172 |
| t3 | 31.668 ± 8.964 | 31.325 ± 8.747 | 627 | 676 | 0.484 |
| t4 | 32.969 ± 8.949 | 32.546 ± 8.548 | 627 | 677 | 0.593 |
| t5 | 44.992 ± 10.880 | 44.649 ± 10.138 | 626 | 676 | 0.547 |
| t6 | 47.981 ± 11.034 | 47.141 ± 10.138 | 626 | 676 | 0.363 |
| t7 | 50.443 ± 12.135 | 49.565 ± 10.399 | 625 | 675 | 0.338 |
| t8 | 53.106 ± 12.969 | 52.619 ± 11.552 | 625 | 676 | 0.718 |
| t9+ | 65.352 ± 12.176 | 64.397 ± 11.756 | 627 | 677 | 0.173 |
| cc2 | 10.530 ± 3.231 | 10.654 ± 2.960 | 627 | 676 | 0.524 |
| cc3 | 13.327 ± 4.926 | 13.375 ± 4.650 | 626 | 676 | 0.725 |
| tM | 80.461 ± 12.140 | 80.049 ± 12.217 | 626 | 677 | 0.387 |
| tSB | 93.273 ± 11.542 | 93.218 ± 11.135 | 626 | 677 | 0.933 |
| tB | 102.642 ± 12.855 | 102.292 ± 12.559 | 626 | 677 | 0.698 |
| tEB | 111.355 ± 13.137 | 110.576 ± 12.911 | 622 | 677 | 0.303 |
| ICM | 3.029 ± 0.693 | 3.000 ± 0.682 | 628 | 684 | 0.427 |
| TE | 2.656 ± 0.623 | 2.809 ± 0.628 | 616 | 669 | **<0.00001** |

**Supplementary Table 2 | Values of hyperparameters along with hyperparameter optimization search spaces.** Hyperparameters were determined by grid search.

| **Algorithm** | **Hyperparameter** | **Value** | **Search Space** |
| --- | --- | --- | --- |
| Decision Tree | Maximum Depth | 10 | {10, 100, 1000} |
| Random Forest | Maximum Depth | 10 | {10, 100, 1000} |
|  | Number of Estimators | 100 | {10, 100, 1000} |
| Logistic Regression | C (Regularisation Weight) | 0.1 | {0.1, 1, 10} |
|  | Regularisation Strategy | L2 | {None, L2} |
| Multilayer Perceptron | Number of Layers | 1 | {1, 2, 3} |
|  | Hidden Layer Size | 128 | {128, 256, 512} |
| TE Baseline | TE Cut-off | C | {A, B, C, D} |
|  | Operation | < | {<, >} |
| KIDScore D3 Baseline | KIDScore D3 Cut-off | 4 | {1, 2, 3, 4, 5} |
|  | Operation | < | {>, <} |
